# Supplementary material for: The crystal structure of the first borohydride borate, Ca3(BD4)3(BO3)
Source: Royal Society of Chemistry journal article supplement (doi:10.1039/c1jm00074h), 2011-01-01
Supplement: c1jm00074h.pdf [file c1jm00074h.pdf]

## **Supporting Information for the manuscript**

### **On the formation and structure of the first calcium borohydride borate, $\text{Ca}_3(\text{BD}_4)_3(\text{BO}_3)$**

## Phonon density of states

In order to understand the stability of the experimentally identified phase we have calculated phonon density of states for  $\text{Ca}_3(\text{BD}_4)_3(\text{BO}_3)$  at the theoretical equilibrium volume (Fig. 1). For this phase no imaginary frequency was identified. This indicates that the experimentally identified structure is ground-state structures for the  $\text{Ca}_3(\text{BD}_4)_3(\text{BO}_3)$  composition, or at least it is a dynamically stable compound.

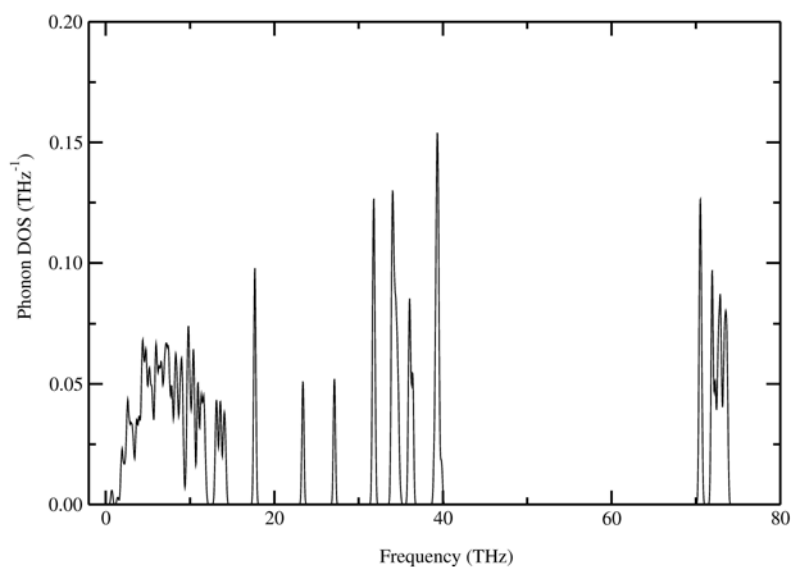

**Fig. 1.** Calculated total phonon density of states for the  $\text{Ca}_3(\text{BH}_4)_3(\text{BO}_3)$  phase.

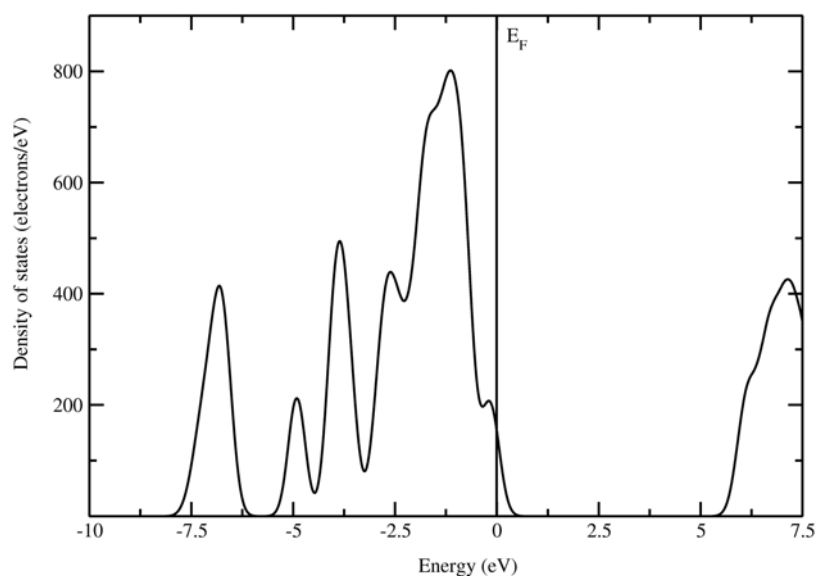

**Fig. 2.** Calculated total density of states for  $\text{Ca}_3(\text{BD}_4)_3(\text{BO}_3)$  at the theoretical equilibrium volume. The Fermi level is set to zero energy and marked by the vertical line.

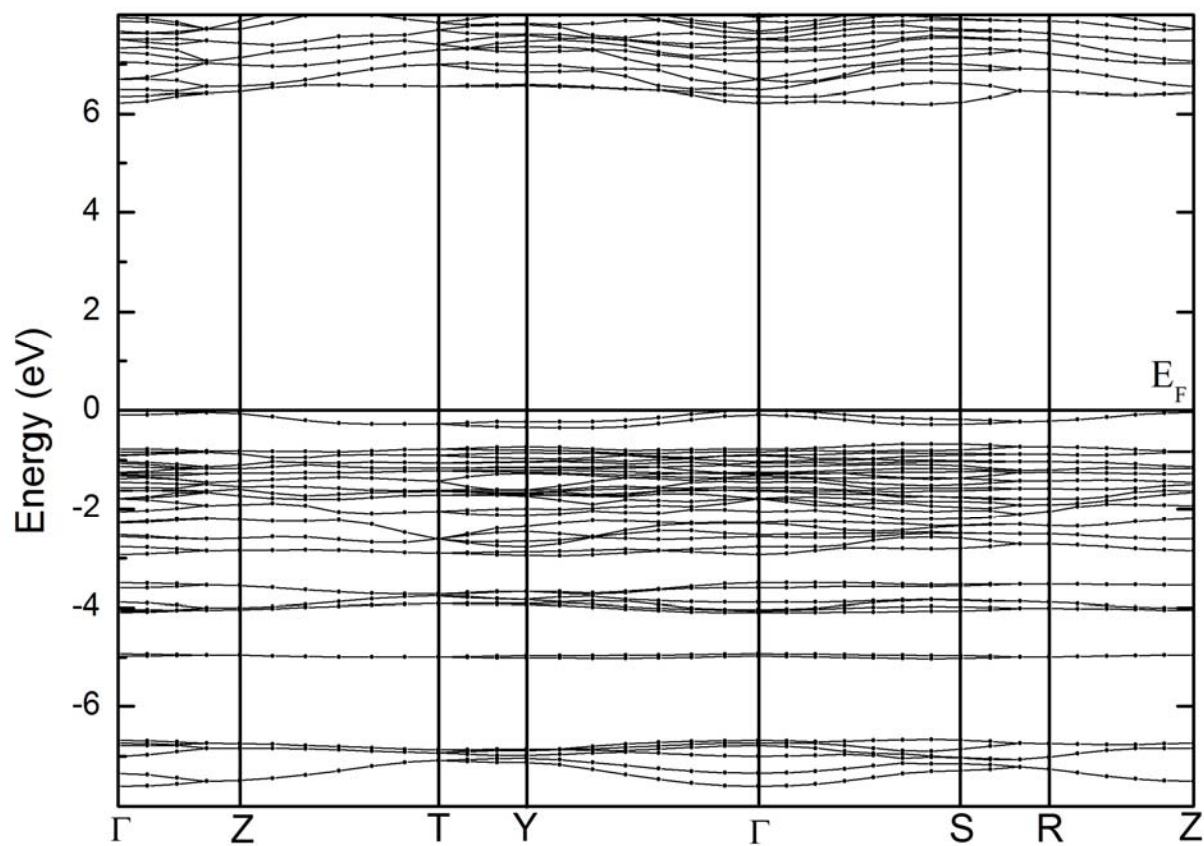

**Fig. 3.** Calculated band structure for  $\text{Ca}_3(\text{BD}_4)_3(\text{BO}_3)$  at the theoretical equilibrium volume. The Fermi level is set at zero energy.

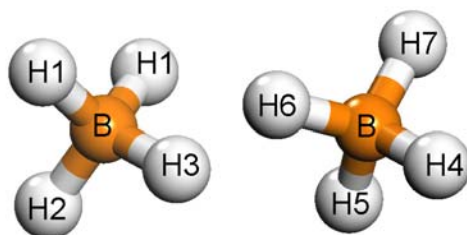

**Fig. 4.** The crystal structure fragment of the  $\text{Ca}_3(\text{BH}_4/\text{D}_4)_3(\text{BO}_3)$  phase. Within the  $\text{BH}_4$  units the different H/D sites are marked according to the positional parameters presented in Table 1, main article.

### IR spectra simulation from theory

We try to identify the H and D positions in the  $\text{Ca}_3(\text{BD}_4)_3(\text{BO}_3)$  phase. Hence, we have replaced the H atom by D in the H1 to H7 sites. The calculated frequencies for the IR active modes are given in Table 1. From the theoretical simulation we conclude that statistically H occupies D1 to D7 sites randomly. It does not occupy any single well-defined crystallographic sites. The experimentally obtained IR spectra show two B-H broad peaks (around 2297 and 2382  $\text{cm}^{-1}$ ). The net difference between these two peaks is only 80  $\text{cm}^{-1}$ . From the theoretically simulated IR spectra for the different H occupancy (with respect to the sites D1-D7) the peak position varies within 80  $\text{cm}^{-1}$ . The simulated IR spectra for one of the configurations are shown in Fig. 6.

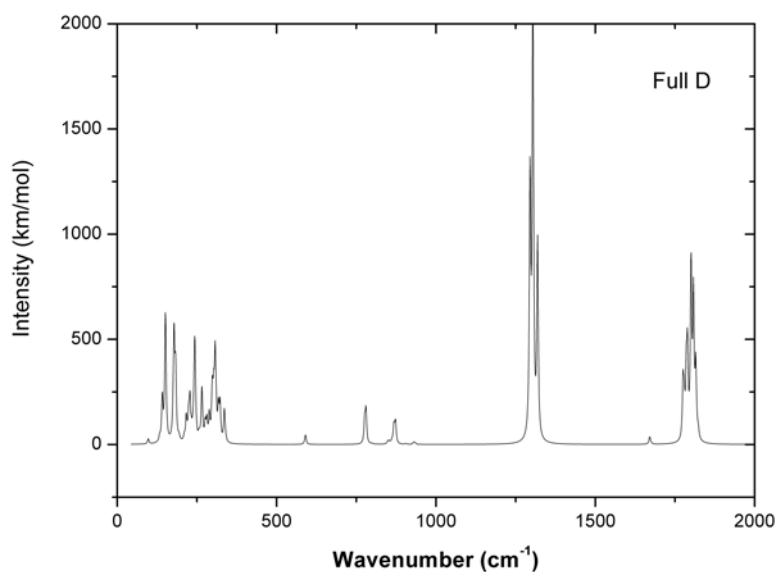

**Fig. 5.** Theoretically simulated IR spectra for the Ca<sub>3</sub>(BD<sub>4</sub>)<sub>3</sub>(BO<sub>3</sub>) phase.

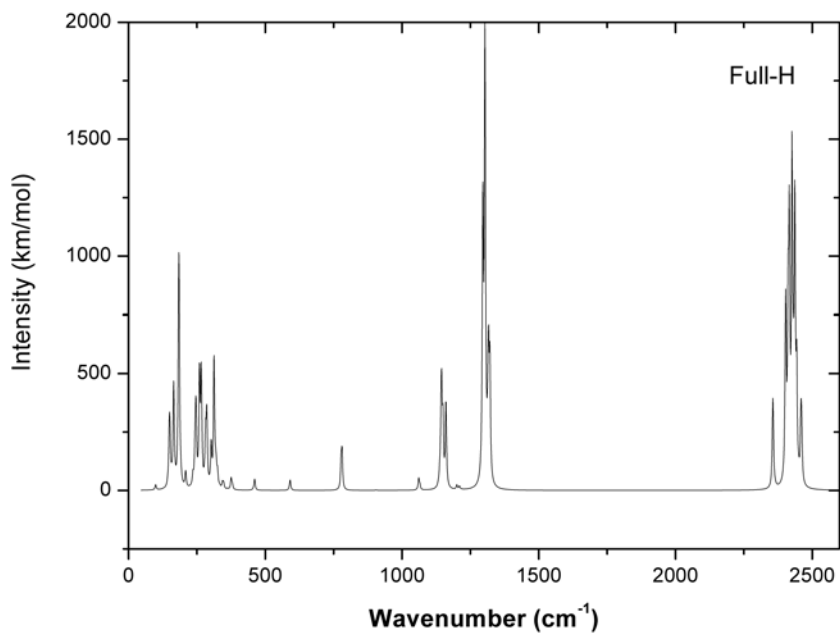

**Fig. 6.** Theoretically simulated IR spectra for the Ca<sub>3</sub>(BH<sub>4</sub>)<sub>3</sub>(BO<sub>3</sub>) phase.

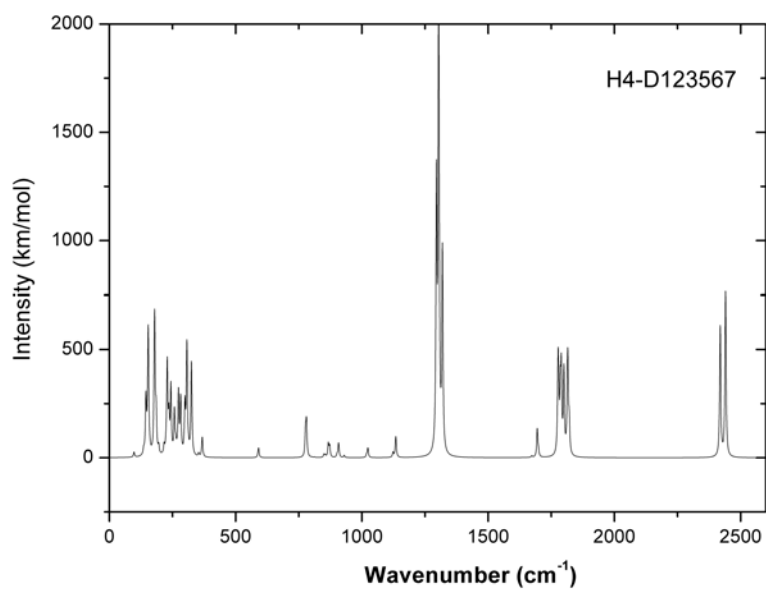

**Fig. 7.** Theoretically simulated IR spectra for the  $\text{Ca}_3(\text{BD}_4)_3(\text{BO}_3)$  phase, where the D4 site is replaced by the H atom.

**Table 1.** Calculated frequency (in  $\text{cm}^{-1}$ ) for the IR active modes, intensity (in  $\text{km/mol}$ ), and the irreducible representation of the modes (irrep.) at the  $\Gamma$  point of the Brillouin zone for  $\text{Ca}_3(\text{BH}_4)_3(\text{BO}_3)$ ,  $\text{Ca}_3(\text{BD}_4)_3(\text{BO}_3)$ , and  $\text{Ca}_3(\text{BHD}_3)_3(\text{BO}_3)$  phases.

| $\text{Ca}_3(\text{BH}_4)_3(\text{BO}_3)$ |                                     |        | $\text{Ca}_3(\text{BD}_4)_3(\text{BO}_3)$ |                                     |        | $\text{Ca}_3(\text{BHD}_3)_3(\text{BO}_3)$ |                                     |        |
|-------------------------------------------|-------------------------------------|--------|-------------------------------------------|-------------------------------------|--------|--------------------------------------------|-------------------------------------|--------|
| Frequency<br>( $\text{cm}^{-1}$ )         | IR intensity<br>( $\text{km/mol}$ ) | Irrep. | Frequency<br>( $\text{cm}^{-1}$ )         | IR intensity<br>( $\text{km/mol}$ ) | Irrep. | Frequency<br>( $\text{cm}^{-1}$ )          | IR intensity<br>( $\text{km/mol}$ ) | Irrep. |
| 98.97                                     | 21.808                              | B1     | 97.45                                     | 24.652                              | B1     | 97.58                                      | 23.758                              | B1     |
| 143.38                                    | 11.059                              | B1     | 132.88                                    | 23.259                              | B1     | 135.72                                     | 23.246                              | B1     |
| 144.22                                    | 2.867                               | A1     | 141.38                                    | 208.535                             | A1     | 144.33                                     | 27.633                              | A1     |
| 149.14                                    | 220.927                             | B1     | 143.54                                    | 2.885                               | B1     | 144.65                                     | 226.287                             | B1     |
| 151.45                                    | 153.246                             | B2     | 149.86                                    | 43.669                              | B2     | 149.95                                     | 42.885                              | B2     |
| 157.68                                    | 22.017                              | A1     | 151.28                                    | 578.992                             | A1     | 153.81                                     | 573.218                             | A1     |
| 168.18                                    | 31.760                              | B1     | 157.72                                    | 1.100                               | B1     | 158.89                                     | 5.862                               | B1     |
| 174.25                                    | 4.985                               | A1     | 176.01                                    | 87.841                              | A1     | 159.20                                     | 1.961                               | A1     |
| 183.28                                    | 510.251                             | B2     | 178.07                                    | 3.638                               | B2     | 178.09                                     | 203.475                             | B2     |
| 184.67                                    | 567.834                             | A1     | 178.35                                    | 460.229                             | A1     | 178.46                                     | 5.892                               | A1     |
| 189.99                                    | 1.611                               | B1     | 183.09                                    | 319.413                             | B1     | 179.31                                     | 473.759                             | B1     |
| 191.38                                    | 18.335                              | B2     | 191.29                                    | 1.643                               | B2     | 185.18                                     | 173.681                             | B2     |
| 208.71                                    | 66.982                              | B2     | 193.83                                    | 20.296                              | B2     | 195.33                                     | 36.325                              | B2     |
| 225.02                                    | 1.014                               | B1     | 210.25                                    | 22.701                              | B1     | 209.36                                     | 1.049                               | B1     |
| 230.90                                    | 1.230                               | A1     | 216.48                                    | 113.582                             | A1     | 216.60                                     | 39.614                              | A1     |
| 235.29                                    | 44.426                              | A1     | 221.17                                    | 16.834                              | A1     | 223.91                                     | 24.487                              | A1     |
| 243.27                                    | 165.725                             | B1     | 224.19                                    | 106.595                             | B1     | 227.49                                     | 22.568                              | B1     |
| 246.49                                    | 309.72                              | B2     | 228.04                                    | 185.865                             | B2     | 228.76                                     | 87.633                              | B2     |
| 252.57                                    | 3.613                               | B2     | 232.80                                    | 33.223                              | B2     | 229.34                                     | 325.272                             | B2     |
| 259.25                                    | 473.913                             | B1     | 237.01                                    | 36.996                              | B1     | 235.76                                     | 158.366                             | B1     |
| 265.65                                    | 362.276                             | A1     | 242.30                                    | 293.135                             | A1     | 243.40                                     | 310.003                             | A1     |
| 266.65                                    | 119.952                             | A1     | 244.23                                    | 271.935                             | A1     | 244.84                                     | 1.509                               | A1     |
| 281.21                                    | 202.646                             | B1     | 256.18                                    | 21.199                              | B1     | 257.44                                     | 198.594                             | B1     |
| 285.52                                    | 263.793                             | A1     | 258.51                                    | 11.763                              | A1     | 262.36                                     | 16.846                              | A1     |
| 286.92                                    | 49.007                              | B2     | 264.62                                    | 91.390                              | B2     | 263.17                                     | 26.187                              | B2     |
| 302.12                                    | 172.3013                            | A1     | 266.00                                    | 179.630                             | A1     | 267.73                                     | 12.577                              | A1     |
| 312.50                                    | 557.851                             | B2     | 275.99                                    | 79.610                              | B2     | 273.56                                     | 285.134                             | B2     |
| 318.20                                    | 47.315                              | A1     | 280.98                                    | 92.687                              | A1     | 281.62                                     | 113.430                             | A1     |
| 320.66                                    | 59.576                              | B1     | 288.66                                    | 118.355                             | B1     | 282.65                                     | 151.942                             | B1     |
| 325.31                                    | 56.864                              | B2     | 296.93                                    | 64.308                              | B2     | 299.27                                     | 219.772                             | B2     |
| 333.12                                    | 7.033                               | B1     | 298.53                                    | 183.252                             | B1     | 306.47                                     | 44.431                              | B1     |
| 343.44                                    | 26.997                              | B1     | 302.65                                    | 186.073                             | B1     | 306.80                                     | 408.238                             | B1     |
| 347.51                                    | 24.634                              | A1     | 307.16                                    | 375.802                             | A1     | 307.55                                     | 59.859                              | A1     |
| 361.78                                    | 3.187                               | B2     | 310.17                                    | 94.843                              | B2     | 313.16                                     | 18.665                              | B2     |
| 375.14                                    | 49.561                              | A1     | 317.52                                    | 145.516                             | A1     | 324.62                                     | 170.682                             | A1     |
| 379.48                                    | 19.911                              | B1     | 322.49                                    | 171.782                             | B1     | 324.99                                     | 262.586                             | B1     |
| 455.75                                    | 3.335                               | B2     | 336.01                                    | 102.071                             | B2     | 353.65                                     | 15.917                              | B2     |
| 460.82                                    | 43.079                              | A1     | 336.28                                    | 50.562                              | A1     | 367.60                                     | 90.378                              | A1     |
| 461.79                                    | 4.841                               | B1     | 339.89                                    | 16.308                              | B1     | 369.73                                     | 2.406                               | B1     |
| 588.38                                    | 7.012                               | B1     | 588.24                                    | 6.962                               | B1     | 588.27                                     | 7.055                               | B1     |
| 590.96                                    | 12.408                              | A1     | 590.77                                    | 29.730                              | A1     | 590.82                                     | 29.593                              | A1     |
| 591.08                                    | 29.314                              | B2     | 590.88                                    | 12.627                              | B2     | 590.88                                     | 12.684                              | B2     |
| 777.30                                    | 110.300                             | A1     | 776.43                                    | 111.821                             | A1     | 776.76                                     | 112.337                             | A1     |
| 780.65                                    | 148.968                             | B1     | 780.47                                    | 154.230                             | B1     | 780.49                                     | 153.975                             | B1     |
| 904.74                                    | 1.271                               | A1     | 801.08                                    | 1.245                               | A1     | 811.96                                     | 1.490                               | A1     |
| 1060.83                                   | 22.497                              | A1     | 846.46                                    | 3.829                               | A1     | 849.86                                     | 13.968                              | A1     |
| 1060.94                                   | 6.341                               | B2     | 851.06                                    | 15.059                              | B2     | 855.17                                     | 10.005                              | B2     |
| 1060.97                                   | 19.792                              | B1     | 855.35                                    | 6.273                               | B1     | 867.04                                     | 60.950                              | B1     |
| 1065.26                                   | 12.862                              | A1     | 861.71                                    | 13.630                              | A1     | 869.92                                     | 4.278                               | A1     |
| 1065.45                                   | 6.552                               | B1     | 866.89                                    | 11.306                              | B1     | 871.36                                     | 1.372                               | B1     |
| 1131.99                                   | 1.131                               | B2     | 868.09                                    | 69.868                              | B2     | 872.51                                     | 47.821                              | B2     |

|          |          |    |         |          |    |         |          |    |
|----------|----------|----|---------|----------|----|---------|----------|----|
| 1132.75  | 5.376    | B1 | 871.59  | 39.642   | B1 | 901.71  | 11.876   | B1 |
| 1137.81  | 38.805   | A1 | 873.49  | 75.849   | A1 | 904.69  | 1.166    | A1 |
| 1139.39  | 4.992    | A1 | 904.96  | 2.243    | A1 | 905.56  | 1.203    | A1 |
| 1142.79  | 217.589  | B2 | 906.32  | 1.586    | B2 | 907.76  | 65.911   | B2 |
| 1144.97  | 325.767  | B1 | 929.77  | 9.119    | B1 | 930.03  | 10.440   | B1 |
| 1149.77  | 253.304  | B2 | 931.34  | 1.614    | B2 | 1018.64 | 12.174   | B2 |
| 1160.43  | 364.538  | A1 | 934.28  | 5.119    | A1 | 1023.56 | 28.720   | A1 |
| 1166.85  | 1.090    | B1 | 934.80  | 2.384    | B1 | 1023.61 | 14.875   | B1 |
| 1200.48  | 18.661   | B2 | 1295.16 | 1214.543 | B2 | 1123.21 | 23.369   | B2 |
| 1209.24  | 3.083    | A1 | 1304.06 | 2188.409 | A1 | 1134.14 | 90.518   | A1 |
| 1210.12  | 10.925   | B1 | 1318.86 | 924.919  | B1 | 1136.15 | 9.335    | B1 |
| 1295.3   | 1151.894 | A1 | 1670.36 | 19.313   | A1 | 1295.23 | 1206.156 | A1 |
| 1303.19  | 1876.971 | B2 | 1670.89 | 13.487   | B2 | 1304.19 | 2175.586 | B2 |
| 1311.14  | 38.356   | B2 | 1672.78 | 5.230    | B2 | 1318.91 | 918.180  | B2 |
| 1314.48  | 178.805  | B2 | 1675.55 | 2.392    | B2 | 1672.63 | 4.236    | B2 |
| 1316.66  | 421.367  | B1 | 1775.27 | 177.657  | B1 | 1672.98 | 3.264    | B1 |
| 1318.46  | 3.589    | A1 | 1775.46 | 81.773   | A1 | 1694.52 | 130.060  | A1 |
| 1321.24  | 462.14   | B1 | 1778.84 | 161.983  | B1 | 1699.35 | 17.689   | B1 |
| 2355.06  | 103.84   | A1 | 1785.54 | 292.257  | A1 | 1699.43 | 6.5007   | A1 |
| 2355.96  | 186.674  | B2 | 1789.26 | 389.512  | B2 | 1776.33 | 158.398  | B2 |
| 2357.27  | 135.348  | B1 | 1798.77 | 28.003   | B1 | 1777.05 | 203.817  | B1 |
| 2365.9   | 4.692    | A1 | 1800.50 | 807.772  | A1 | 1778.94 | 179.487  | A1 |
| 2401.61  | 195.172  | A1 | 1807.98 | 662.371  | B1 | 1785.62 | 257.177  | A1 |
| 2402.51  | 266.440  | B1 | 1815.16 | 324.598  | A1 | 1789.61 | 360.193  | B1 |
| 2403.37  | 345.247  | B2 | 1815.91 | 4.037    | B1 | 1799.98 | 384.910  | B2 |
| 2411.66  | 655.023  | A1 | 1818.53 | 9.8262   | B2 | 1813.77 | 177.706  | A1 |
| 2416.04  | 1006.348 | B1 | 1822.03 | 18.611   | A1 | 1815.42 | 339.169  | B1 |
| 2425.98  | 1330.444 | B2 | 1823.89 | 21.432   | B1 | 1820.34 | 87.802   | B2 |
| 2431.04  | 207.708  | B2 |         |          |    | 1821.89 | 46.446   | B2 |
| 2436.25  | 1141.593 | A1 |         |          |    | 1822.22 | 14.597   | A1 |
| 2442.92  | 437.764  | B1 |         |          |    | 2419.16 | 601.873  | B1 |
| 2444.592 | 5.445    | A1 |         |          |    | 2440.14 | 759.369  | A1 |
| 2450.82  | 20.326   | B1 |         |          |    | 2446.91 | 1.2905   | B1 |
| 2458.05  | 179.484  | B2 |         |          |    |         |          |    |
| 2459.77  | 145.763  | A1 |         |          |    |         |          |    |
| 2461.02  | 125.783  | B1 |         |          |    |         |          |    |
